# Supplementary material for: L-Arginine Ameliorates Defective Autophagy in GM2 Gangliosidoses by mTOR Modulation
Source: MDPI journal article supplement (doi:10.3390/cells10113122), 2021-11-11
Supplement: s1 [file s1]

## **Supplementary data**

### **L-arginine ameliorates defective autophagy in GM2 gangliosidosis by mTOR modulation**

Beatriz Castejón-Vega<sup>1</sup>, Débora Lendines-Cordero<sup>1</sup>, Alejandro Rubio<sup>2</sup>, Antonio J. Pérez-Pulido<sup>2</sup>, José L. Quiles<sup>3</sup>, Jon D. Lane<sup>4</sup>, Beatriz Fernández-Domínguez<sup>5</sup>, María Begoña Cachón-González<sup>6</sup>, Carmen Martín-Ruiz<sup>7</sup>, Alberto Sanz<sup>8</sup>, Timothy M. Cox<sup>6</sup>, Elisabet Alcocer-Gómez<sup>9</sup>, Mario D. Cordero<sup>10</sup>

<sup>1</sup> Research Laboratory, Oral Medicine Department, University of Sevilla, Sevilla, Spain

<sup>2</sup> Centro Andaluz de Biología del Desarrollo (CABD, UPO-CSIC-JA). Facultad de Ciencias Experimentales (Área de Genética), Universidad Pablo de Olavide, 41013, Sevilla, Spain.

<sup>3</sup> Department of Physiology, Institute of Nutrition and Food Technology "José Mataix Verdú", Biomedical Research Center, University of Granada, Granada, Spain.

<sup>4</sup> Cell Biology Laboratories, School of Biochemistry, University of Bristol, Bristol, UK

<sup>5</sup> Acción y Cura para Tay-Sachs (ACTAYS), Madrid, Spain

<sup>6</sup> Department of Medicine, University of Cambridge, Cambridge, UK.

<sup>7</sup> Biosciences Institute, Newcastle University, Newcastle upon Tyne, UK.

<sup>8</sup> Institute of Molecular, Cell and Systems Biology, University of Glasgow, Glasgow G12 8QQ, UK.

<sup>9</sup> Departamento de Psicología Experimental, Facultad de Psicología, Universidad de Sevilla, Seville Spain.

<sup>10</sup> Instituto de Investigación e Innovación en Ciencias Biomédicas de Cádiz (INiBICA), Cadiz, Spain.

**Running Title:** Disrupted autophagy and mTOR in Tay-Sachs disease.

#### **Corresponding Authors:**

Dr. Mario D. Cordero

Instituto de Investigación e Innovación en Ciencias Biomédicas de Cádiz (INiBICA),  
Cadiz, Spain, Email: [mario.cordero@inibica.es](mailto:mario.cordero@inibica.es)

## **Supplementary methods**

### **Reagents.**

Trypsin and bafilomycin A1 were purchased from Sigma Chemical Co., (St. Louis, Missouri). Anti-GAPDH monoclonal antibody from Calbiochem-Merck Chemicals Ltd. (Nottingham, UK). MnSOD, catalase and OGG-1 antibodies from Adipogen (San Diego, USA). Phospho-mTOR, mTOR, phosphor-AKT, AKT, LC3, p62, LAMP-I, Cathepsin B, HexA and galectin-3 were obtained from Cell Signaling Technology. A cocktail of protease inhibitors (complete cocktail) was purchased from Boehringer Mannheim (Indianapolis, IN). Grace's insect medium was purchased from Gibco. The Immun Star HRP substrate kit was from Bio-Rad Laboratories Inc. (Hercules, CA).

### **Structural mutation analysis**

Human HexA and HexB cDNA sequences were downloaded from GenBank (Gene ID: 3073 and 3074) and used to interpret the functional effects of the mutations in this autosomal recessive disease with the web application Mutalyzer<sup>1</sup>. To investigate the effect of the mutations on protein folding, cognate 3D crystal structures were obtained from the PDB database (HEXA: 2GJX and HEXB: 1NOU) and viewed using PyMOL. The stability of the mutated structures was examined with the CUPSAT and SDM programmes; these have default values and enable torsion angles and free energy to be estimated, thus allowing changes in protein stability to be predicted.

### **Determination of $\beta$ -hexosaminidase activities**

Lysosomal hexosaminidase activities were measured as described previously<sup>2</sup>. Briefly, total  $\beta$ -hexosaminidase activity (A, B and S isozymes) was measured using the fluorogenic 4-methylumbelliferyl-2-acetamido-2-deoxy-D-glucopyranoside (4-MUG) substrate, whereas the HexA isozyme activity was determined with the sulphated, 4-

methylumbelliferyl-7-[6-sulpho-2-acetamido-2-deoxy- $\beta$ -D-glucopyranoside] (4-MUGS) substrate, which is preferentially hydrolysed by the A and minor S isozymes.

### **Western Blotting**

Whole cellular lysate from fibroblasts was prepared by gentle shaking with a buffer containing 0.9% NaCl, 20 mM Tris-ClH, pH 7.6, 0.1% Triton X-100, 1 mM phenylmethylsulfonylfluoride and 0.01% leupeptin. The protein content was determined by the Bradford method. Electrophoresis was carried out in a 10–15% acrylamide SDS/PAGE and proteins were transferred to Immobilon membranes (Amersham Pharmacia, Piscataway, NJ). Next, membranes were washed with PBS, blocked over night at 4°C and incubated with the respective primary antibody solution (1:1000). Membranes were then probed with their respective secondary antibody (1:2500). Immunolabeled proteins were detected by chemiluminescence method (Immun Star HRP substrate kit, Bio-Rad Laboratories Inc., Hercules, CA). Western blot images were quantified using ImageJ software.

### **Electron microscopy**

Fibroblasts were fixed for 15 min in the culture plates with 1.5% glutaraldehyde in culture medium and then for 30 min in 1.5% glutaraldehyde-0.1 M NaCacodylate/HCl, pH 7.4. After three washes in 0.1 M sodium cacodylate/HCl, pH 7.4 for 10 min, the cells were post-fixed and stained with 1% aqueous osmium tetroxide, pH 7.4 for 30 min. After dehydration in increasing concentrations of ethanol, 5 min for each step: 50, 70, 90 and three cycles at 100% ethanol, the cells were impregnated and included in Epon, which was finally polymerised at 60°C for 48 h. 60–80 nm sections were cut in a Leica ultracut S ultramicrotome (Leitz Microsystems, Wetzlar, Germany) and contrasted with uranyl acetate and lead citrate. Cell ultrastructure was examined by electron transmission microscopy (Zeiss LEO 906 E; Oberkochen, Germany).

### **Proliferation rate**

Two hundred thousand fibroblasts were cultured with or without the addition of L-arginine, L-leucine or DL-acetyl-leucine at different concentrations (1, 10, 5mM) for 24, 48, 72, and 120h. After discharging supernatant with dead cells, cells from three high-power fields were counted with an inverted microscope using a 40X objective

### **Cathepsin B and HexA release**

CatB and HexA redistribution from lysosomes/autophagolysosomes to the cytosol was assessed by immunofluorescence using antibodies against CatB or HexA and LAMP-I as a marker of lysosomal/autophagolysosomal compartment. In control fibroblasts, CatB-specific immunostaining shows punctate cytoplasmic structures surrounded by lysosomal/autophagolysosomal membrane proteins such as LAMP-I. After lysosomal permeabilisation, immunofluorescence of CatB or HexA reveals diffuse staining throughout the entire cell.

### **Galectin 3 puncta**

Lysosomal permeabilisation was also evaluated by quantification of intracellular galectin puncta, as previously described.

### **Protein synthesis**

Briefly, the cells were incubated with serum-free DMEM for 90 min followed by incubation with 1  $\mu$ M puromycin (an analogue of tyrosyl-tRNA; Invitrogen; A11138-03), for 30 min. The amount of puromycin incorporated into nascent peptides was then evaluated by Western blot using an antibody to puromycin.

### **L-arginine treatment in patients**

Two patients with GM2 gangliosidosis (Juvenile Tay-Sachs disease 3 and Sandhoff disease 2, (see Supplementary table 1), who had not been exposed to any drug or vitamin/nutritional supplements, were supplemented with oral L-arginine (Nutricia) for 8 months (0.3g/Kg/day). After 8 months of treatment, heparinised blood samples were collected 24 hours after the last dose. No significant changes in routine clinical laboratory tests conducted on blood serum or plasma, including measures of renal and hepatic function, were observed (data not shown).

1. Wildeman M, van Ophuizen E, den Dunnen JT, Taschner PE. Improving sequence variant descriptions in mutation databases and literature using the Mutalyzer sequence variation nomenclature checker. *Hum Mutat*, 2008; 29: 6-13.
2. Tropak MB, Reid SP, Guiral M, Withers SG, and Mahuran D. Pharmacological enhancement of b-hexosaminidase activity in fibroblasts from adult Tay-Sachs and Sandhoff Patients. *J. Biol. Chem.* 2004;279:13478–13487.

**Supplementary Table 1. Clinical characteristic of the patients**

| <b>Infantile 1</b>                                                                                                                                                                                        |                              |
|-----------------------------------------------------------------------------------------------------------------------------------------------------------------------------------------------------------|------------------------------|
| 2 years old                                                                                                                                                                                               | Gender: Male                 |
| <b>Signs and symptoms:</b>                                                                                                                                                                                |                              |
| -Epilepsy                                                                                                                                                                                                 | -Startle with noise          |
| -Abnormal ocular movements                                                                                                                                                                                | - Hyperreflexia              |
| -Respiratory problems                                                                                                                                                                                     | -Psychomotor regression      |
| -Macrocephaly                                                                                                                                                                                             | -Low visual acuity           |
| -Hypotonia severe                                                                                                                                                                                         | -Pyramidal syndrome          |
| <b>Enzyme levels:</b>                                                                                                                                                                                     |                              |
| -Isoenzymatic distribution %A: 33,5%                                                                                                                                                                      | RL: 84,0-97,0                |
| -Isoenzymatic distribution %B: 66,5%                                                                                                                                                                      | RL: 3,0-16,0                 |
| -β-hexosaminidase total: 1916 nmol/h/mg prot                                                                                                                                                              | RL:336-2868                  |
| <b>-β-hexosaminidase A: 4 nmol/h/mg prot</b>                                                                                                                                                              | RL:61-316                    |
| -Esfingomielinase: 14,9 nmol/17h/mg prot                                                                                                                                                                  | RL:8,5-26,0                  |
| -β-glucocerebrosidase: 14,6 nmol/h/mg prot                                                                                                                                                                | RL:2,9-27,6                  |
| <b>Infantile 2</b>                                                                                                                                                                                        |                              |
| 1 year old                                                                                                                                                                                                | Gender: Male                 |
| <b>Signs and symptoms:</b>                                                                                                                                                                                |                              |
| -Startle with noise                                                                                                                                                                                       | -Abnormal ocular movements   |
| -Absent of cephalic support                                                                                                                                                                               | -Hyperreflexia               |
| -Psychomotor delays                                                                                                                                                                                       | -Cherry-red spot             |
| -Respiratory problems                                                                                                                                                                                     | -Dysphagia                   |
| -Severe hypotonia                                                                                                                                                                                         |                              |
| <b>Biochemistry:</b>                                                                                                                                                                                      |                              |
| -CPK, CDT, iron metabolism, folic acid, B12 vitamin, lactate, ammonium, copper, ceruloplasmina, immunoglobulins, homocysteine, 3-hydroxybutyrate, free fatty acids, long-chain fatty acids: Normal levels |                              |
| <b>Very low HexA enzymatic activity</b>                                                                                                                                                                   |                              |
| <b>Infantile 3</b>                                                                                                                                                                                        |                              |
| 4 years old                                                                                                                                                                                               | Gender: Female               |
| <b>Signs and symptoms:</b>                                                                                                                                                                                |                              |
| -Macrocephaly                                                                                                                                                                                             | -Absence of cephalic support |
| -Visual deficit                                                                                                                                                                                           | -Epilepsies                  |
| -Total absence of the language                                                                                                                                                                            | -Muscle spasms               |
| -Hipotonia                                                                                                                                                                                                | -Cherry-red spot             |
| -Absence of autonomous displacement                                                                                                                                                                       | -Hipomielynization           |
| <b>Biochemistry:</b>                                                                                                                                                                                      |                              |
| -CPK, CDT, folic acid, B12 vitamin, lactate, ammonium, copper, ceruloplasmina, immunoglobulins, homocysteine, 3-hydroxybutyrate, free fatty acids, long-chain fatty acids: Normal levels                  |                              |
| <b>Very low HexA enzymatic activity</b>                                                                                                                                                                   |                              |
| <b>Juvenile 1</b>                                                                                                                                                                                         |                              |
| 14 years old                                                                                                                                                                                              | Gender: Male                 |

|                                                                                                                                   |                                |
|-----------------------------------------------------------------------------------------------------------------------------------|--------------------------------|
| <b>Signs and symptoms:</b>                                                                                                        |                                |
| -Development delays                                                                                                               | -Drops-attacks episodes        |
| -Startle with noise                                                                                                               | -Motor and language regression |
| -Facial dysmorphia                                                                                                                | -Dysphagia                     |
| -Macrocephaly                                                                                                                     | -Myelination alteration        |
| -Slight psychomotor development delay                                                                                             | -Slow brain activity           |
|                                                                                                                                   | -Visual deficit                |
| <b>Biochemistry:</b>                                                                                                              |                                |
| -Low levels of HDL                                                                                                                |                                |
| -High levels of AST and LDH                                                                                                       |                                |
| -Lactate, ammonium, amino acids, iron profile, creatine, guanidinoacetate, organic acids, GAGs, 4-OH butyrate: Normal levels      |                                |
| <b>Low levels of HexA activity: 3nmol/h/mg prot</b>                                                                               |                                |
| RL: 61-316 3nmol/h/mg prot                                                                                                        |                                |
| <b>Juvenile 2</b>                                                                                                                 |                                |
| 13 years old                                                                                                                      | Gender: Female                 |
| <b>Signs and symptoms:</b>                                                                                                        |                                |
| -Severe dysphagia                                                                                                                 | -Somatocraneal disproportion   |
| -Motor delays                                                                                                                     | -Slow movements                |
| -Language regression (skills)                                                                                                     | -Cherry-red spot               |
| -Skills and motor regression                                                                                                      |                                |
| <b>Biochemistry:</b>                                                                                                              |                                |
| -CPK, ammonium, lactate, ceruloplasmin, iron profile, B12 vitamin, folic acid, amino acids, long-chain fatty acids: Normal levels |                                |
| <b>Low levels of HexA</b>                                                                                                         |                                |
| <b>Juvenile 3</b>                                                                                                                 |                                |
| 16 years old                                                                                                                      | Gender: Female                 |
| <b>Sings and symptoms:</b>                                                                                                        |                                |
| -Language regression                                                                                                              | -Motor delays                  |
| -Dysphagia                                                                                                                        | -Lumbar hyperlordosis          |
| -Dysarthria                                                                                                                       |                                |
| <b>Low HexA enzymatic activity 6% of activity</b>                                                                                 |                                |
| 65% of discapacity                                                                                                                |                                |

**Supplementary Table 2. Genetic characteristic of the patients.**

| Patient     | Nº Allele | Mutation                        | Affects Stability? | Affects active site? |
|-------------|-----------|---------------------------------|--------------------|----------------------|
| Infantile 1 | Allele 1  | Premature STOP codon            | Yes                | Yes                  |
|             | Allele 2  | Splicing                        | Unknown            | Unknown              |
| Infantile 2 | Allele 1  | Near splicing site              | Unknown            | Unknown              |
|             | Allele 2  | Near splicing site              | Unknown            | Unknown              |
| Infantile 3 | Allele 1  | Near splicing site              | Unknown            | Unknown              |
|             | Allele 2  | Near splicing site              | Unknown            | Unknown              |
| Juvenil 1   | Allele 1  | Point                           | No                 | No                   |
|             | Allele 2  | Point                           | Yes                | Yes                  |
| Juvenil 2   | Allele 1  | Point                           | Yes                | Yes                  |
|             | Allele 2  | Point                           | Unknown            | Unknown              |
| Juvenil 3   | Allele 1  | Splicing                        | Unknown            | Unknown              |
|             | Allele 2  | Point (Synonymous substitution) | No                 | No                   |
| Sandhoff 1  | Allele 1  | Point                           | Yes                | No                   |
|             | Allele 2  | Intron                          | No                 | No                   |
| Sandhoff 2  | Allele 1  | Premature STOP codon            | Yes                | Yes                  |
|             | Allele 2  | Intron                          | No                 | No                   |



**Supplementary Table 3.** Significant changes in mTOR pathway genes in patients vs control (ANOVA p-value <0.05, >1.5 fold).

| Juvenile         |             |               |                 |
|------------------|-------------|---------------|-----------------|
| Gene Symbol      | Fold-Change | ANOVA p-value | Gene IDs        |
| PIK3R1           | 12,94       | 0,001497      | NM_001242466    |
| RPS6KA2          | 3,23        | 0,01184       | NM_001006932    |
| ATP6V1B2         | 2,84        | 0,035385      | NM_001693       |
| FNIP2            | 2,39        | 0,007737      | NM_020840       |
| RPS6KA1          | 1,69        | 0,044762      | ENST00000627677 |
| IRS1             | 1,55        | 0,031457      | NM_005544       |
| CLIP1            | -1,49       | 0,01208       | NM_001247997    |
| HRAS             | -1,72       | 0,035889      | NM_005343       |
| ATP6V1C1         | -1,73       | 0,02705       | NM_001695       |
| RICTOR           | -1,91       | 0,0558        | NM_001285439    |
| PRKAA2           | -2,71       | 0,040698      | NM_006252       |
| WNT5B            | -2,85       | 0,022171      | NM_030775       |
| RPS6KA6          | -4,34       | 0,007977      | NM_014496       |
| RNF152           | -6,08       | 0,009278      | NM_173557       |
| WNT5A            | -47,42      | 0,003877      | NM_001256105    |
| Infantile        |             |               |                 |
| Gene Symbol      | Fold-Change | ANOVA p-value | Gene IDs        |
| PIK3R1           | 12,95       | 2,06E-05      | NM_001242466    |
| LRP5             | 3,81        | 0,0045        | NM_001291902    |
| RPS6KA2          | 2,51        | 0,0337        | NM_001006932    |
| FNIP2            | 2,12        | 0,0207        | NM_020840       |
| LRP6             | 2,04        | 0,0392        | ENST00000628182 |
| ATP6V1E2         | 2,03        | 0,043         | NM_080653       |
| WNT11            | 2           | 0,0283        | NM_004626       |
| ATP6V1B2         | 1,93        | 0,0207        | NM_001693       |
| TNFRSF1A         | 1,88        | 0,0197        | NM_001065       |
| EIF4E2           | 1,86        | 0,0489        | NM_001276336    |
| FZD1             | 1,84        | 0,0387        | NM_003505       |
| NPRL3            | 1,79        | 0,0382        | NM_001039476    |
| ATP6V1G3         | 1,54        | 0,0105        | NM_133262       |
| FZD5             | -1,48       | 0,0182        | NM_003468       |
| SLC38A9          | -1,55       | 0,0502        | NM_001258286    |
| RAF1             | -1,78       | 0,0051        | NM_002880       |
| ATP6V1C1         | -1,83       | 0,0037        | NM_001695       |
| AKT1             | -1,89       | 0,0477        | NM_001014431    |
| WNT2B            | -1,95       | 0,0126        | NM_001291880    |
| PIK3R2;<br>IFI30 | -2,01       | 0,0325        | NM_005027       |
| PRKAA2           | -2,03       | 0,0205        | NM_006252       |

|                    |                    |                      |                 |
|--------------------|--------------------|----------------------|-----------------|
| SEH1L              | -2,33              | 0,0121               | NM_001013437    |
| IGF2; INS-IGF2     | -2,46              | 0,0003               | NM_001007139    |
| WNT5B              | -2,74              | 0,015                | NM_030775       |
| RPS6KA6            | -2,8               | 0,0027               | NM_014496       |
| RICTOR             | -2,83              | 0,0018               | NM_001285439    |
| LPIN1;<br>MIR548S  | -4,22              | 0,0083               | NM_001261427    |
| RNF152             | -8,06              | 6,21E-06             | NM_173557       |
| <b>Sandhoff</b>    |                    |                      |                 |
| <b>Gene Symbol</b> | <b>Fold-Change</b> | <b>ANOVA p-value</b> | <b>Gene IDs</b> |
| PIK3R1             | 10,84              | 0,038841             | NM_001242466    |
| FNIP2              | 3,05               | 0,013828             | NM_020840       |
| STRADA             | 2,31               | 0,028354             | NM_001003786    |
| LRP6               | 2,02               | 0,00027              | NM_002336       |
| IGF1R              | 1,95               | 0,034823             | NM_000875       |
| ATP6V1C1           | -1,64              | 0,044767             | NM_001695       |
| RAF1               | -1,74              | 0,036988             | NM_002880       |
| PRKCA              | -2,95              | 0,020134             | NM_002737       |
| RPS6KA6            | -3                 | 0,017731             | NM_014496       |
| WNT5A              | -3,91              | 0,026136             | NM_001256105    |
| RNF152             | -10,18             | 0,007434             | NM_173557       |

**Supplementary Table 4.** Significant changes in Autophagy pathway genes in patients vs control (ANOVA p-value <0.05, >1.5 fold).

| Infantile          |             |               |              |
|--------------------|-------------|---------------|--------------|
| Gene Symbol        | Fold-Change | ANOVA p-value | Gene IDs     |
| PIK3R1             | 12,95       | 2,06E-05      | NM_001242466 |
| RAB7B              | 5,1         | 0,0001        | NM_001164522 |
| RRAS2              | 3,31        | 0,0022        | NM_001102669 |
| DAPK1              | 2,26        | 0,0281        | NM_001288729 |
| ZFYVE1             | 2,05        | 0,0204        | NM_001281734 |
| HIF1A              | 2,03        | 0,0277        | NM_001243084 |
| GABARAP            | 1,87        | 0,0073        | NM_007278    |
| BAD                | 1,84        | 0,0049        | NM_004322    |
| CTSB               | 1,72        | 0,034         | NM_001908    |
| ATG10              | 1,64        | 0,0259        | NM_001131028 |
| RAF1               | -1,78       | 0,0051        | NM_002880    |
| AKT1               | -1,89       | 0,0477        | NM_001014431 |
| PIK3R2;<br>IFI30   | -2,01       | 0,0325        | NM_005027    |
| PRKAA2             | -2,03       | 0,0205        | NM_006252    |
| ATG4D              | -2,17       | 0,0145        | NM_001281504 |
| IGF2; INS-<br>IGF2 | -2,46       | 0,0003        | NM_001007139 |
| ATG7               | -2,7        | 0,0022        | NM_001136031 |
| ERN1               | -3,29       | 0,0032        | NM_001433    |
| PRKCD              | -3,64       | 0,0003        | NM_006254    |
| Juvenile           |             |               |              |
| Gene Symbol        | Fold-Change | ANOVA p-value | Gene IDs     |
| PIK3R1             | 12,94       | 0,001497      | NM_001242466 |
| RAB7B              | 2,87        | 0,01827       | NM_001164522 |
| GABARAP            | 1,92        | 0,031715      | NM_007278    |
| HIF1A              | 1,72        | 0,01766       | NM_001243084 |
| ZFYVE1             | 1,71        | 0,04872       | NM_001281734 |
| IRS1               | 1,55        | 0,031457      | NM_005544    |
| HRAS               | -1,72       | 0,035889      | NM_005343    |
| PRKCD              | -2,28       | 0,024094      | NM_006254    |
| PRKAA2             | -2,71       | 0,040698      | NM_006252    |

| Sandhoff    |             |               |              |
|-------------|-------------|---------------|--------------|
| Gene Symbol | Fold-Change | ANOVA p-value | Gene IDs     |
| PIK3R1      | 10,84       | 0,038841      | NM_001242466 |
| RAB7B       | 3,68        | 0,042686      | NM_001164522 |
| IGF1R       | 1,95        | 0,034823      | NM_000875    |
| DAPK2       | 1,92        | 0,019391      | NM_014326    |
| PRKACG      | 1,83        | 0,0003        | NM_002732    |
| PIK3R4      | 1,63        | 0,037854      | NM_014602    |
| PIK3CD      | -1,38       | 0,00897       | NM_005026    |
| VAMP8       | -1,43       | 0,042707      | NM_003761    |
| PIK3C3      | -1,62       | 0,039853      | NM_001308020 |
| RAF1        | -1,74       | 0,036988      | NM_002880    |
| EIF2AK4     | -1,88       | 0,016362      | NM_001013703 |
| BCL2L1      | -3,26       | 0,011985      | NM_001191    |
| PRKCD       | -3,6        | 0,005909      | NM_006254    |

**Supplementary Table 5.** Significant changes in lysosome pathway genes in patients vs control (ANOVA p-value <0.05, >1.5 fold).

| Juvenile    |             |               |                  |
|-------------|-------------|---------------|------------------|
| Gene Symbol | Fold-Change | ANOVA p-value | Gene IDs         |
| CD68        | 4,16        | 0,040966      | NM_001040059     |
| CTSO        | 2,68        | 0,037234      | NM_001334        |
| LAPTM4A     | 1,8         | 0,020544      | hsa_circ_0000981 |
| IGF2R       | -1,58       | 0,022001      | NM_000876        |
| LITAF       | -1,7        | 0,021841      | NM_001136472     |
| SCARB2      | -1,88       | 0,009984      | NM_001204255     |
| NAGA        | -2,18       | 0,021429      | NM_000262        |
| CLTCL1      | -2,37       | 0,037322      | NM_001835        |
| NEU1        | -2,57       | 0,048515      | ENST00000375631  |
| CTSZ        | -2,82       | 0,030783      | NM_001336        |
| AGA         | -3,03       | 0,044367      | NM_000027        |
| ARSG        | -4,12       | 0,037029      | NM_001267727     |
| NPC1        | -5,83       | 0,031279      | NM_000271        |
| SORT1       | -5,89       | 0,010414      | NM_001205228     |
| Infatile    |             |               |                  |
| Gene Symbol | Fold-Change | ANOVA p-value | Gene IDs         |
| CD68        | 5,7         | 0,036         | NM_001040059     |
| CTSO        | 2           | 0,0252        | NM_001334        |
| ARSA        | 1,9         | 0,0356        | NM_000487        |
| CTSB        | 1,72        | 0,034         | NM_001908        |
| LGMN        | 1,62        | 0,0414        | NM_001008530     |
| CTSF        | 1,49        | 0,0346        | NM_003793        |
| LAPTM4B     | -1,87       | 0,0051        | NM_018407        |
| LIPA        | -2,19       | 0,0152        | NM_000235        |
| NEU1        | -2,75       | 0,0067        | ENST00000375631  |
| CTNS        | -2,81       | 0,0057        | NM_001031681     |
| AGA         | -3,45       | 0,0006        | NM_000027        |
| ARSG        | -3,52       | 0,0172        | NM_001267727     |
| NPC1        | -7,34       | 0,0004        | NM_000271        |
| HEXA        | -27,12      | 0,0075        | NM_000520        |
| Sandhoff    |             |               |                  |
| Gene Symbol | Fold-Change | ANOVA p-value | Gene IDs         |
| CD68        | 7,3         | 0,003732      | NM_001040059     |
| LAPTM4A     | 2,51        | 0,044028      | hsa_circ_0000981 |
| AP1G2       | 1,2         | 0,026778      | NM_001282474     |
| CLTC        | -1,33       | 0,034873      | NM_001288653     |
| CLTA        | -1,35       | 0,000585      | NM_001076677     |
| LITAF       | -2,34       | 0,006126      | NM_001136472     |
| IGF2R       | -2,36       | 0,027342      | NM_000876        |

|     |       |          |           |
|-----|-------|----------|-----------|
| AGA | -3,51 | 0,008182 | NM_000027 |
|-----|-------|----------|-----------|

**Supplementary Table 6.** Significant changes in arginine biosynthesis pathway genes in patients vs control (ANOVA p-value <0.05, >1.5 fold).

| Juvenile     |             |               |                       |
|--------------|-------------|---------------|-----------------------|
| Gene Symbol  | Fold-Change | ANOVA p-value | Gene IDs              |
| CPS1         | 1,96        | 0,040666      | NM_001122633          |
| ABHD14A-ACY1 | 1,69        | 0,003892      | OTTHUMT00000349691    |
| GOT2         | -3,89       | 0,032579      | NM_001286220          |
| GLUL         | -4,21       | 0,003389      | NM_001033044          |
| ASS1         | -12,13      | 0,002704      | NM_000050             |
| Infantile    |             |               |                       |
| Gene Symbol  | Fold-Change | ANOVA p-value | Gene IDs              |
| GLS          | 3,03        | 0,018         | NM_001256310          |
| GOT1         | -1,5        | 0,0427        | NM_002079             |
| NOS3         | -1,71       | 0,0237        | NOS3.kAug10-unspliced |
| GOT2         | -3,71       | 0,0113        | NM_001286220          |
| GLUL         | -5,81       | 6,62E-06      | NM_001033044          |
| ASS1         | -8,45       | 0,0003        | NM_000050             |
| Sandhoff     |             |               |                       |
| Gene Symbol  | Fold-Change | ANOVA p-value | Gene IDs              |
| ABHD14A-ACY1 | 2           | 0,005936      | OTTHUMT00000349691    |
| GOT2         | -4,04       | 0,040265      | NM_001286220          |
| GLUL         | -4,56       | 0,009998      | NM_001033044          |
| ASS1         | -44,73      | 0,013876      | NM_000050             |

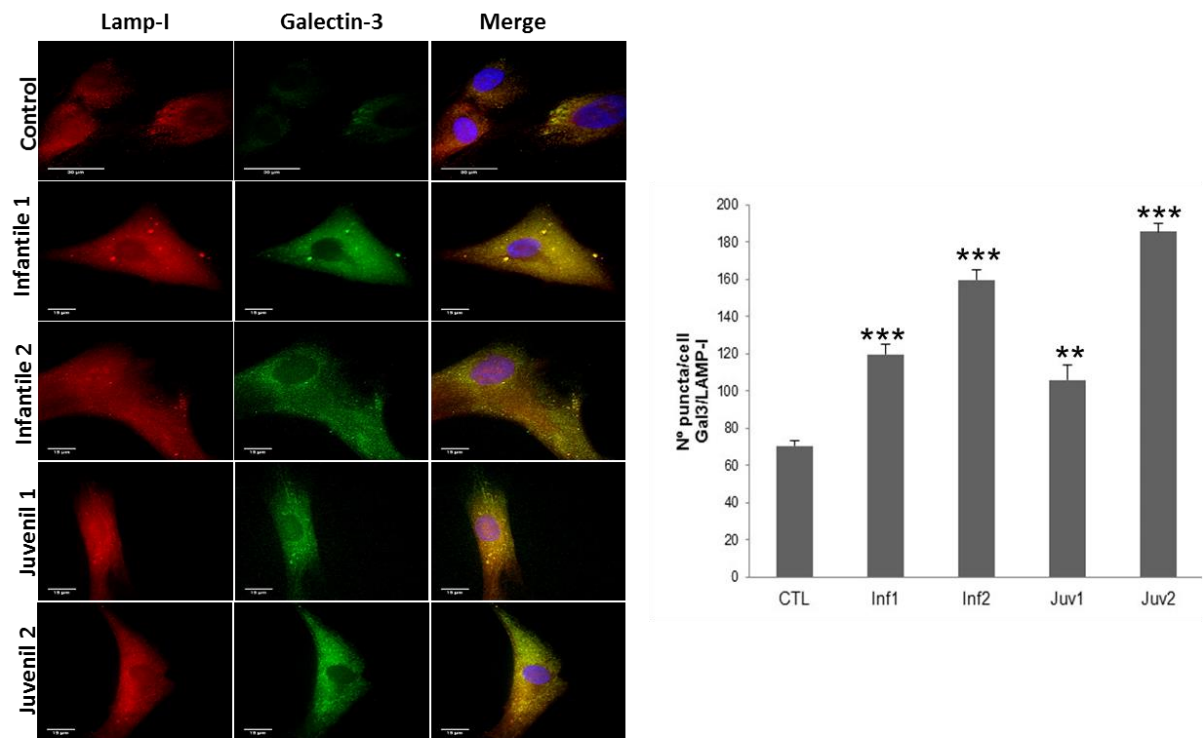

**Supplementary Figure 1.** Representative fluorescence images and quantification of fibroblasts from control and TSD. Cells were fixed and stained with anti-Galectin-3 antibodies (green) and anti-LAMP-I (red). Nuclei were stained with Hoechst 33342 (blue). Increased Galectin-3- puncta and colocalization of Galectin-3 and LAMP-I puncta are shown in patients. The data are the mean  $\pm$  SD for experiments conducted on 2 different control cell lines and three separate experiments. \*\*\* $p < 0.001$ , \*\* $p < 0.005$ , \* $p < 0.05$  between controls and TSD patients.

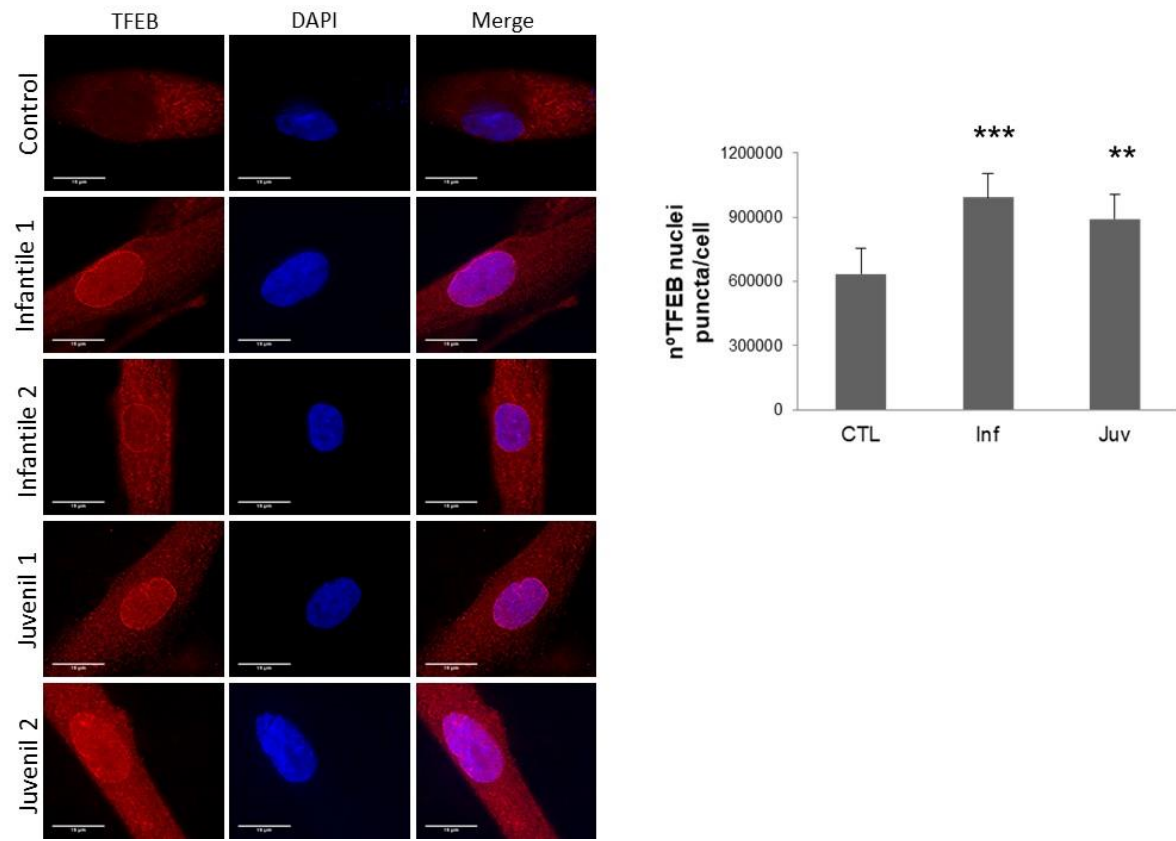

**Supplementary Figure 2.** Representative fluorescence images and quantification of fibroblasts from control and Tay-Sachs (TSD). Cells were fixed and stained with anti-TFEB antibodies (red). Nuclei were stained with Hoechst 33342 (blue). Increased TFEB in nucleus are shown in patients by red and blue fluorescence signal colocalization.



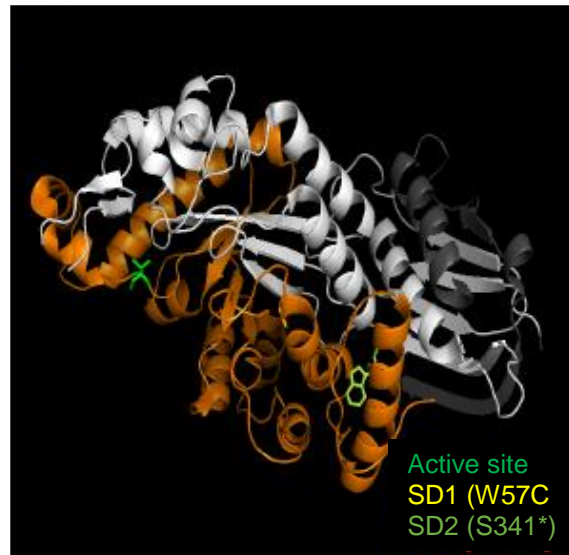

**Supplementary Figure 3.** HEXB point mutations and frameshifts. The active site is also highlighted. Grey colour represents the propeptide, and white colour represents the main chain of the protein. Orange color represents the sequence lost by the SD1 patient due to a frameshift.

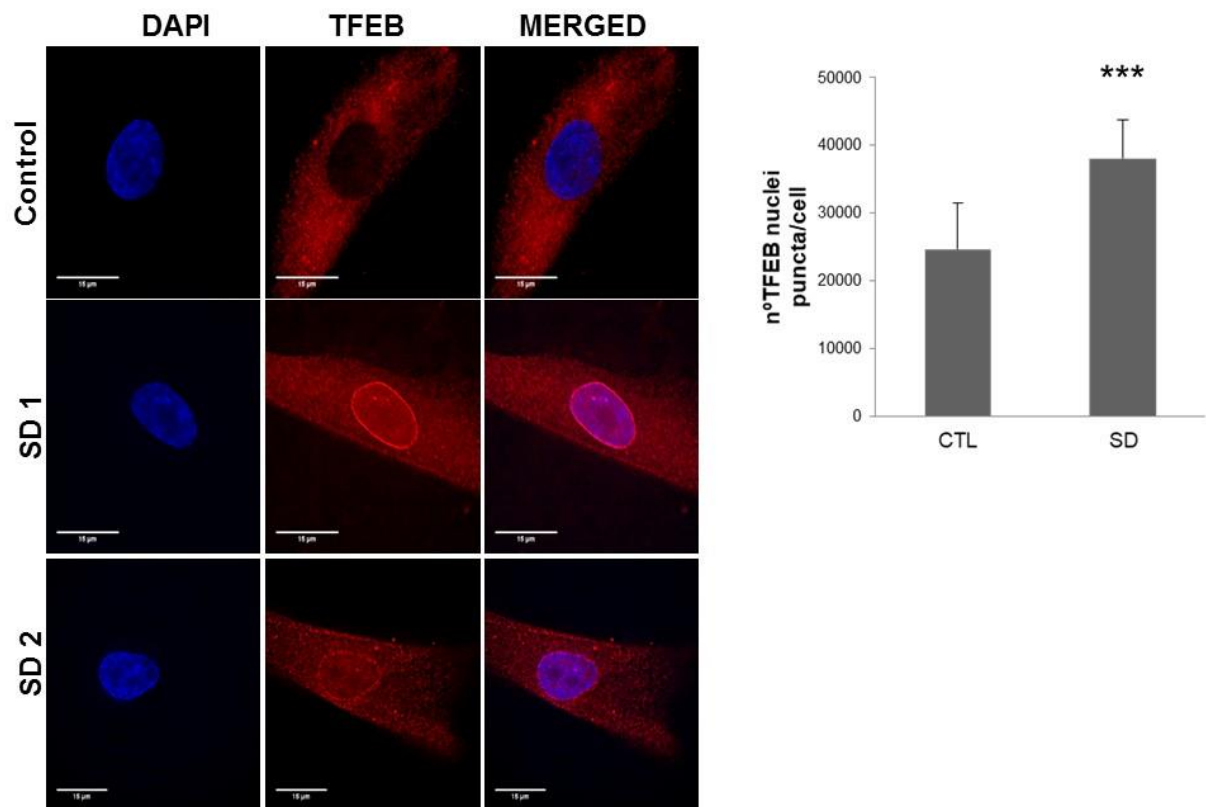

**Supplementary Figure 4.** Representative fluorescence images and quantification of fibroblasts from control and Sandhoff (SD). Cells were fixed and stained with anti-TFEB antibodies (red). Nuclei were stained with Hoechst 33342 (blue). Increased TFEB in nucleus are shown in patients by red and blue fluorescence signal colocalization.

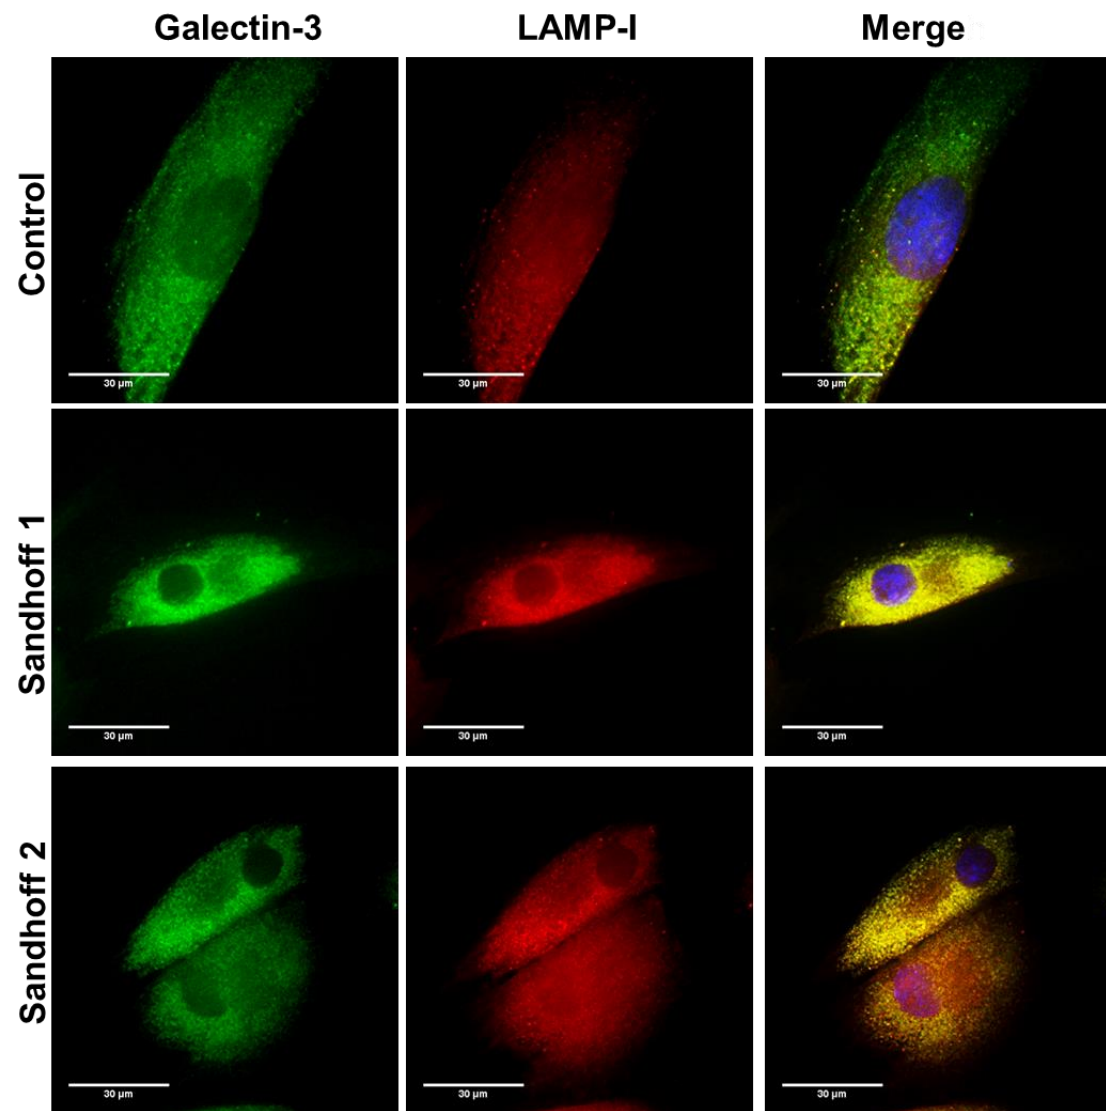

**Supplementary Figure 5.** Representative fluorescence images and quantification of fibroblasts from control and Sandhoff patients. Cells were fixed and stained with anti-Galectin-3 antibodies (green) and anti-LAMP-I (red). Nuclei were stained with Hoechst 33342 (blue).

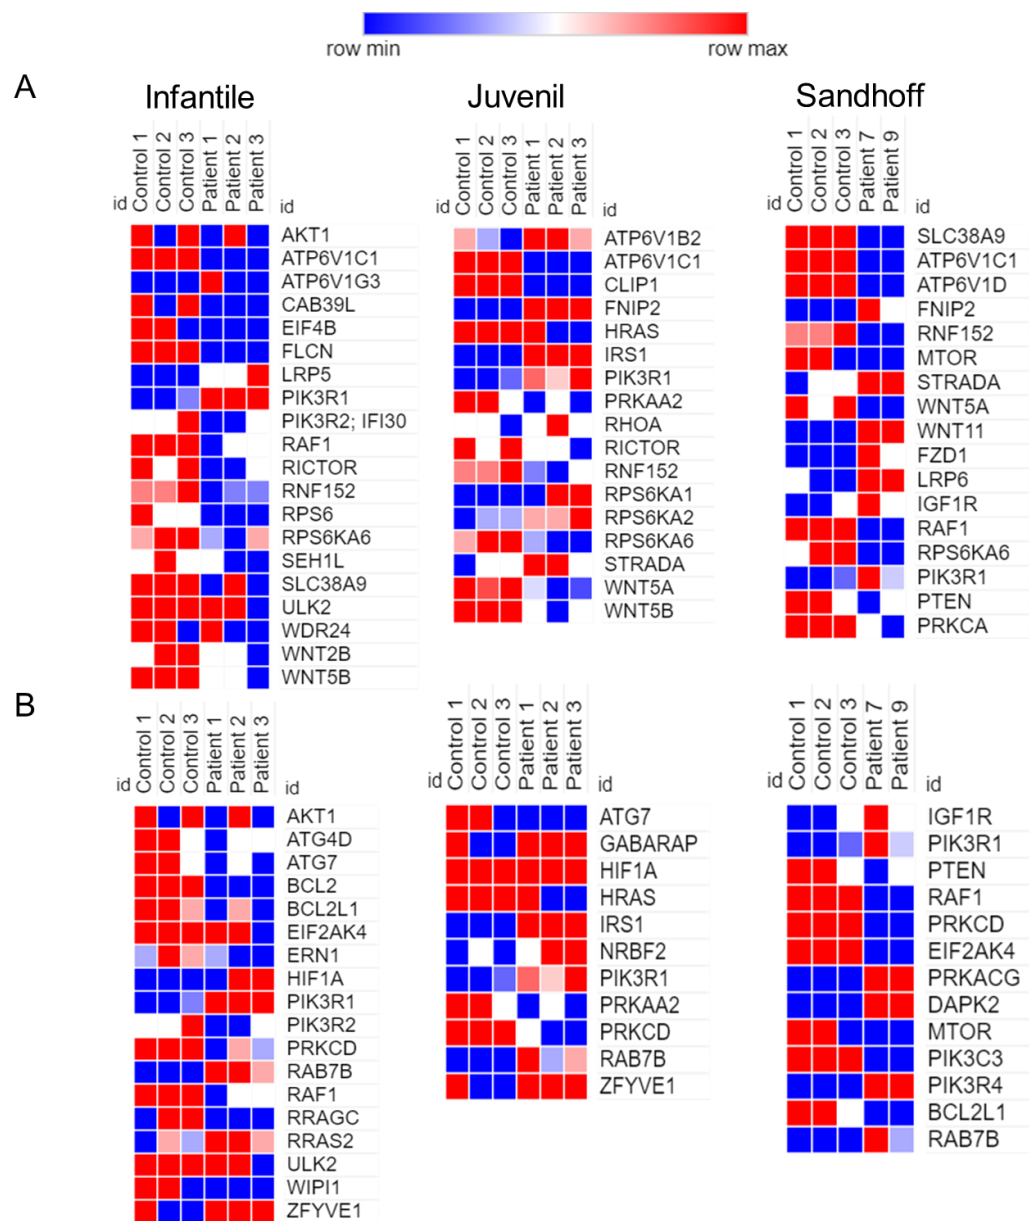

**Supplementary Figure 6.** Heatmap clustering of enrichment (z-scores) of the mTOR functions (A) and autophagy (B) in set of coding genes differentially expressed between control and diseased fibroblasts (n = 3 per case).

## Lysosome pathway

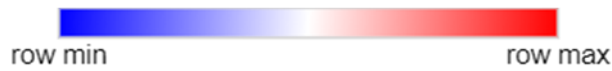

### Infantile vs CTL

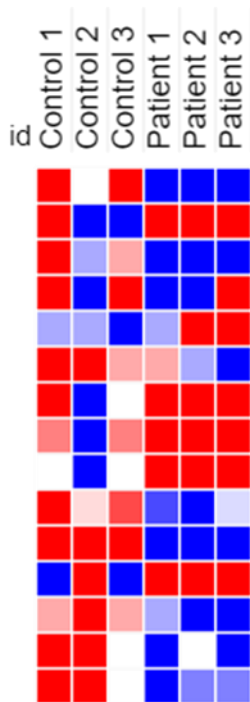

### Juvenile vs CTL

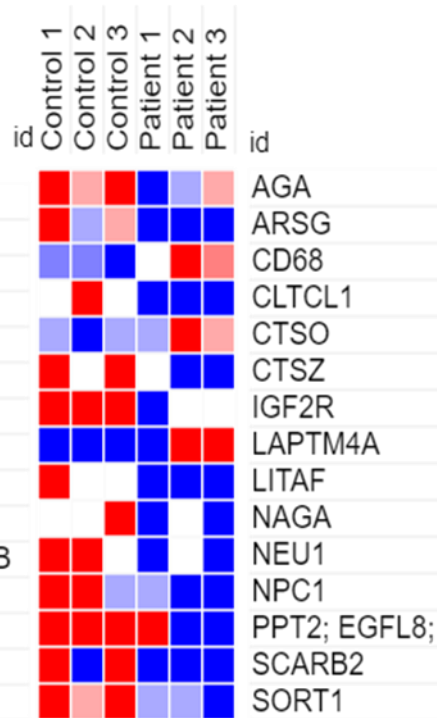

**Supplementary Figure 7.** Heatmap clustering of enrichment (z-scores) of the lysosome function in set of coding genes differentially expressed between Control vs Tay-Sachs patients (n = 3 per case).

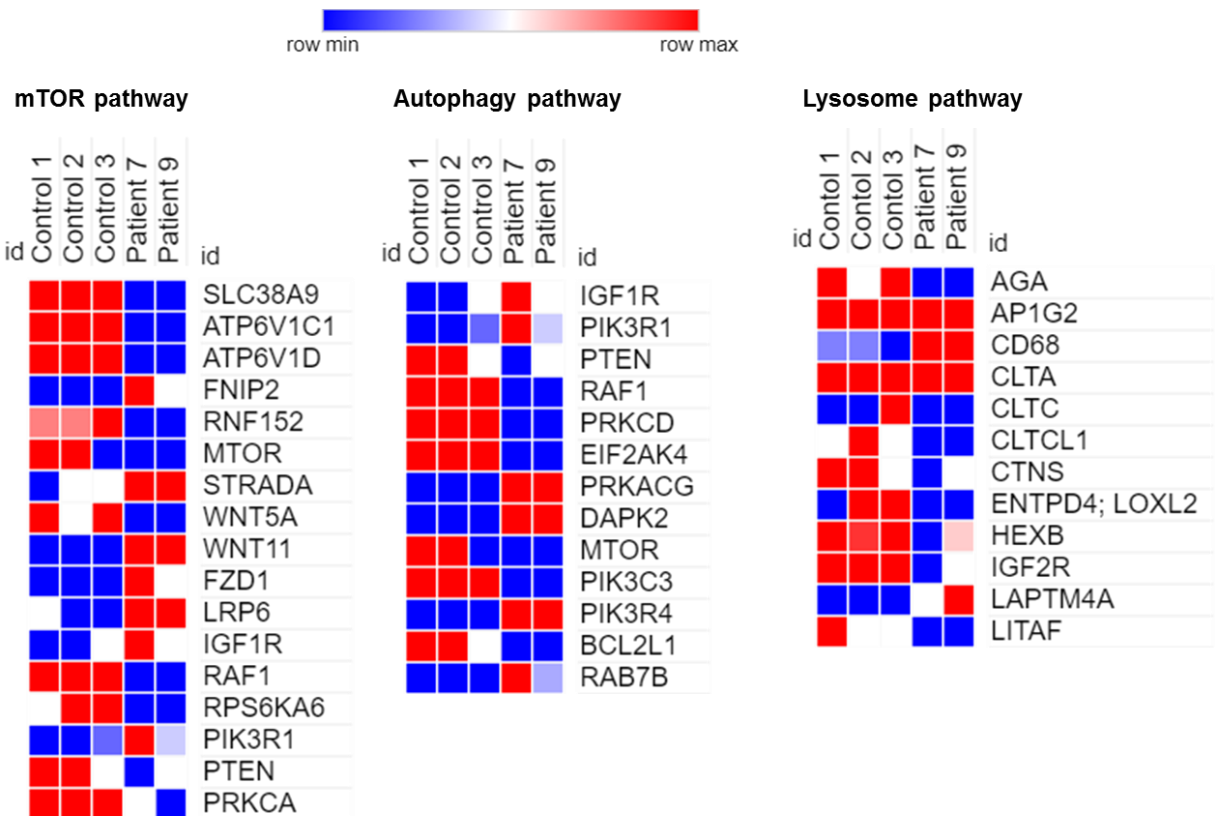

**Supplementary Figure 8.** Heatmap clustering of enrichment (z-scores) of the mTOR (left), autophagy (center) and lysosome (right) functions in set of coding genes differentially expressed between Control vs Sandhoff patients (n = 3 per case).

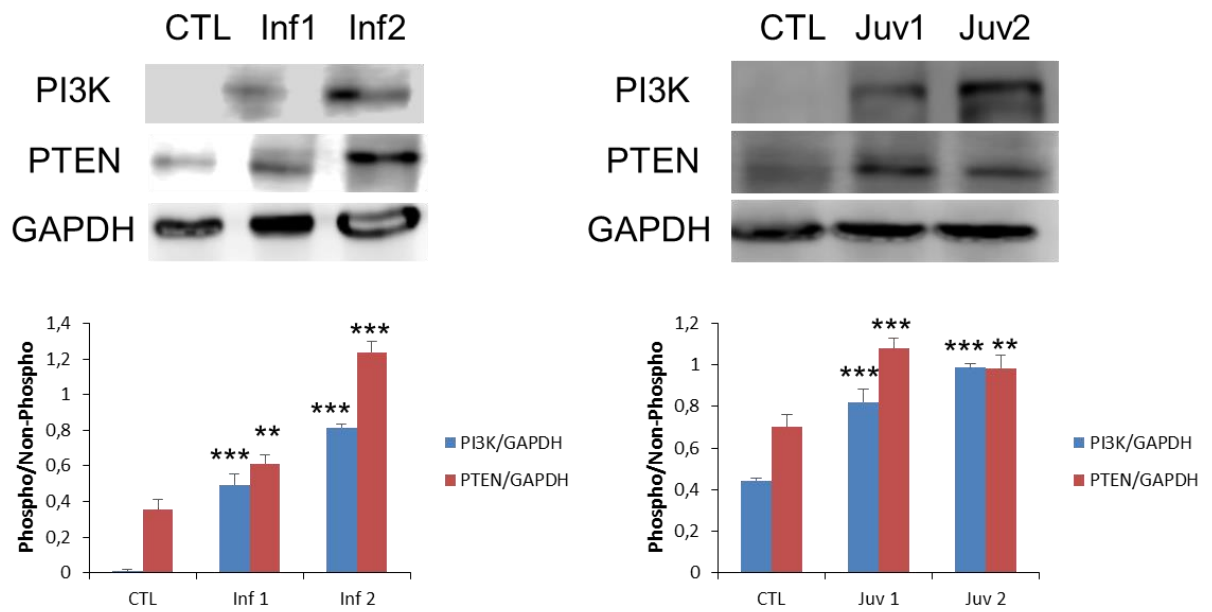

**Supplementary Figure 9.** Protein expression levels of PI3K and PTEN of representative control and Tay-Sachs patient fibroblasts. The data are the mean  $\pm$  SD for experiments conducted on 2 different control cell lines and three separate experiments. \* $P < 0.05$ ; \*\* $P < 0.01$ ; \*\*\* $P < 0.001$  between control and patients.

## L-Arginine treatment

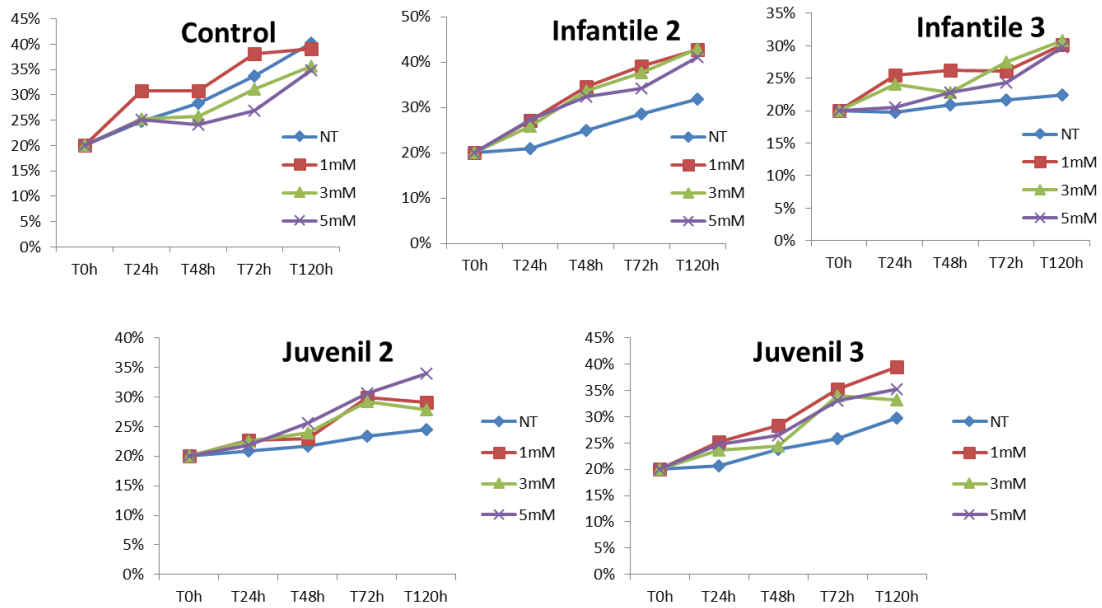

**Supplementary Figure 10.** Percentage of cell growth with L-Arginine determined in healthy and representative Tay-Sachs fibroblasts using three different doses (1, 3 and 5mM).



## L-Leucine treatment

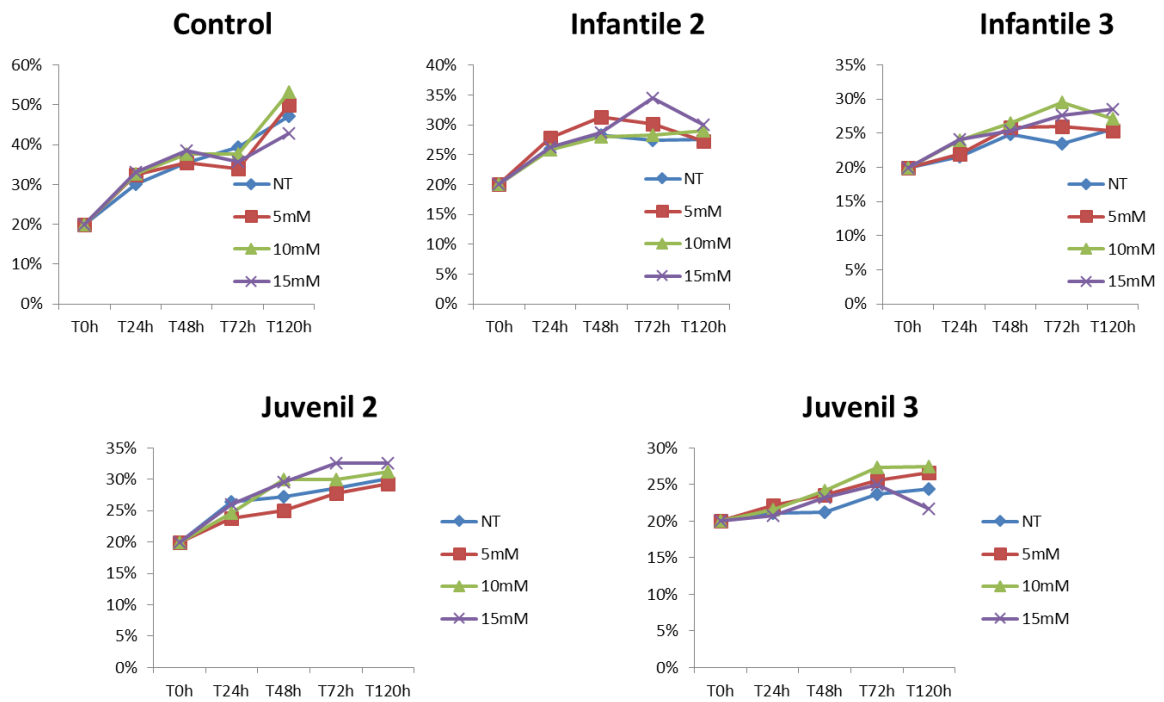

**Supplementary Figure 11.** Percentage of cell growth with L-Leucine determined in healthy and representative Tay-Sachs fibroblasts using three different doses (5, 10 and 15mM).

## DL-Acetyl-Leucine treatment

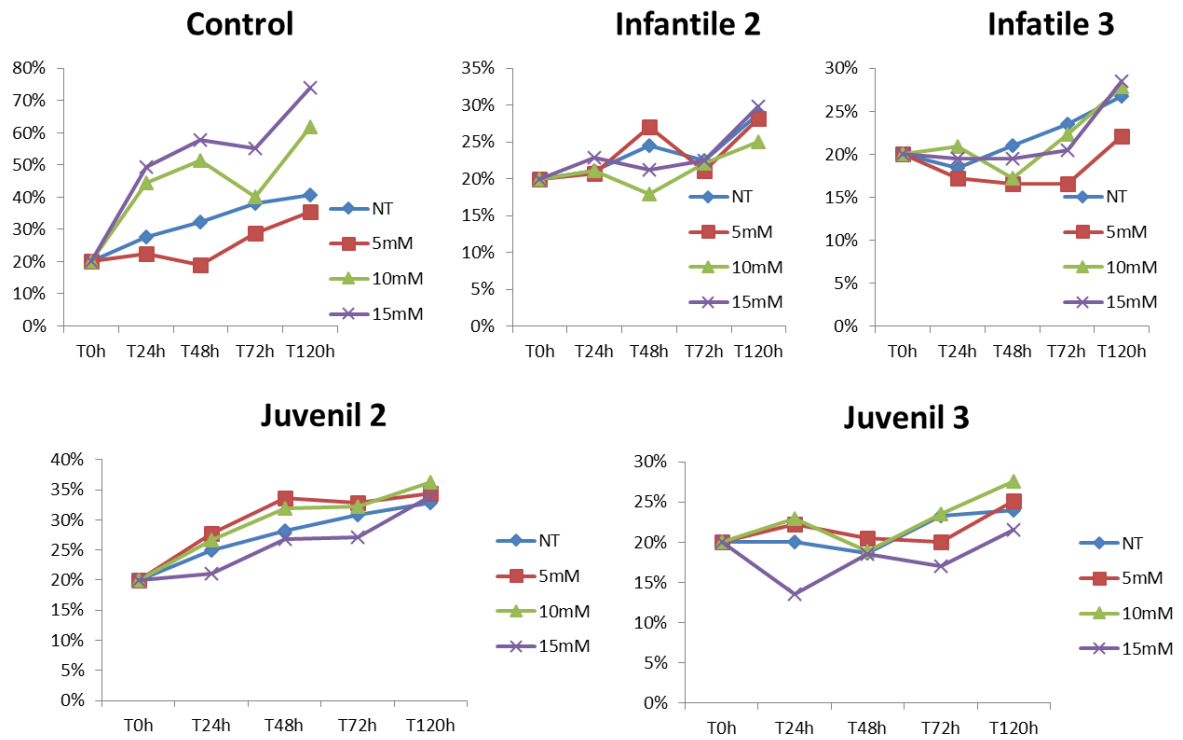

**Supplementary Figure 12.** Percentage of cell growth with DL-Acetyl-Leucine determined in healthy and representative Tay-Sachs fibroblasts using three different doses (5, 10 and 15mM).

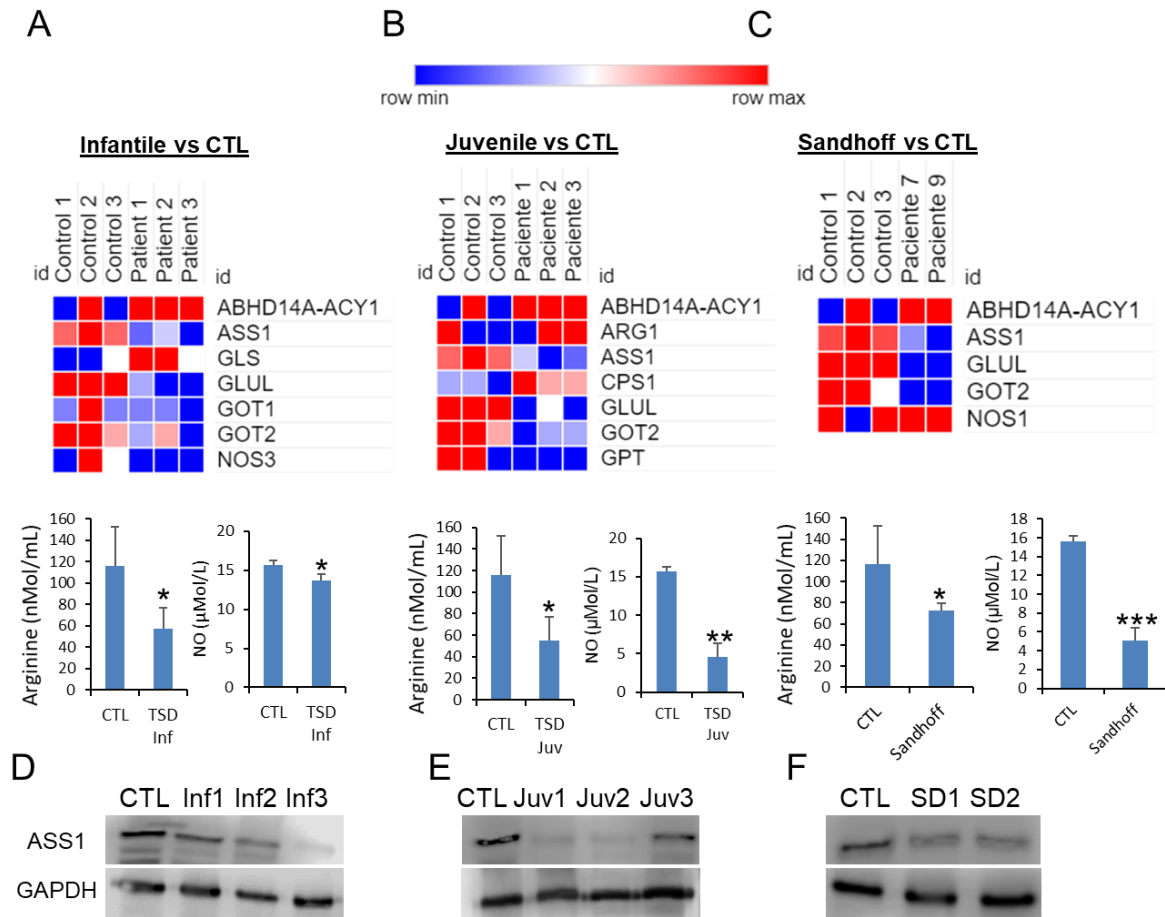

Supplementary Figure 14

**Supplementary Figure 13.** Heatmap clustering of enrichment (z-scores) of the arginine biosynthesis functions in set of coding genes differentially expressed and serum arginine and nitric oxide levels in infantile Tay-Sachs (TSD) (A), juvenile TSD (B) and Sandhoff (SD) (C) (n = 3 per case). Protein expression levels of ASS1 in fibroblasts from infantile TSD (D), juvenile TSD (E) and SD (F). The data are the mean  $\pm$  SD for experiments conducted on 2 different control cell lines and three separate experiments. \*P < 0.05; \*\*P < 0.01; \*\*\*P < 0.001 between control and patients;

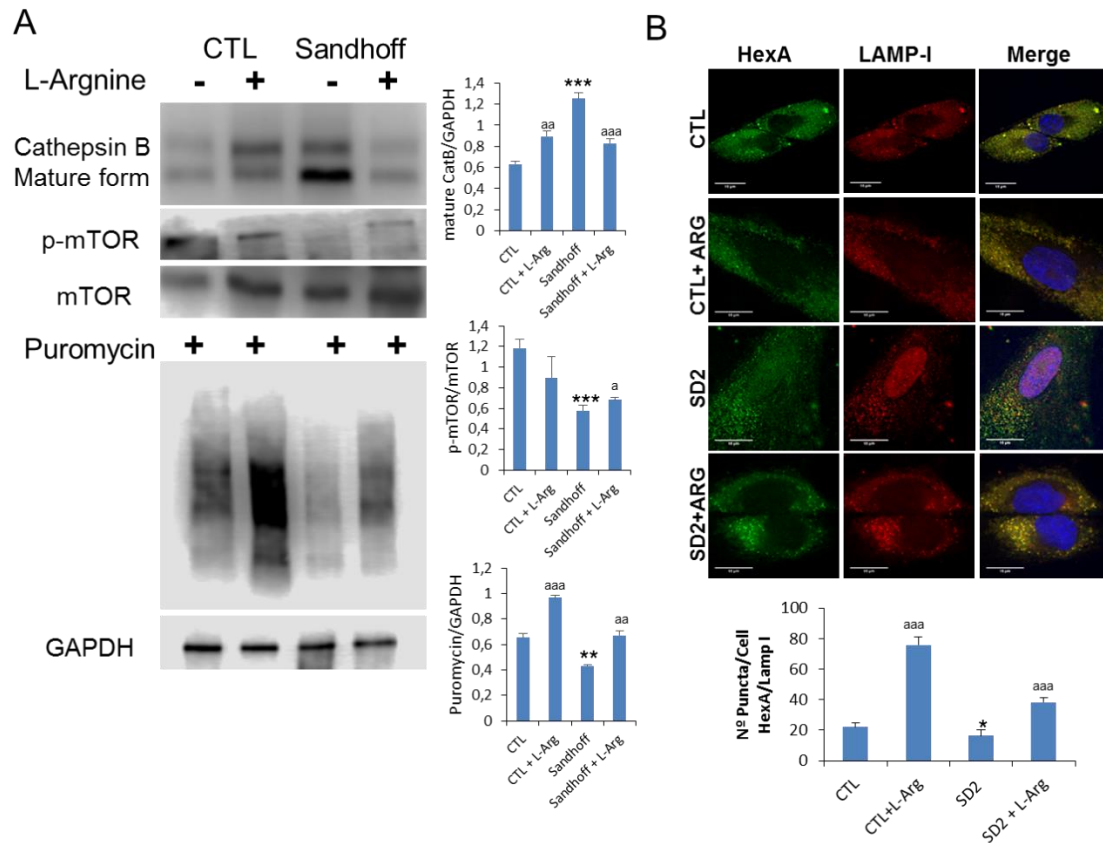

**Supplementary Figure 14. A.** Protein expression levels of mTOR and CatB were determined in control and representative SD fibroblast cultures after L-arginine treatment (120h). Protein synthesis was quantified in protein extracts of control and Sandhoff (SD) fibroblasts treated with L-arginine using puromycin labeling followed by immunoblot. **B.** Immunofluorescence of HexA in control and SD cells and quantification after L-arginine treatment. The data are the mean  $\pm$  SD for experiments conducted on 2 different control cell lines and three separate experiments. \*P < 0.05; \*\*P < 0.01; \*\*\*P < 0.001 between control and SD patients; <sup>a</sup> P < 0.05; <sup>aa</sup> P < 0.01; <sup>aaa</sup> P < 0.001 between non-treated and treated cells.

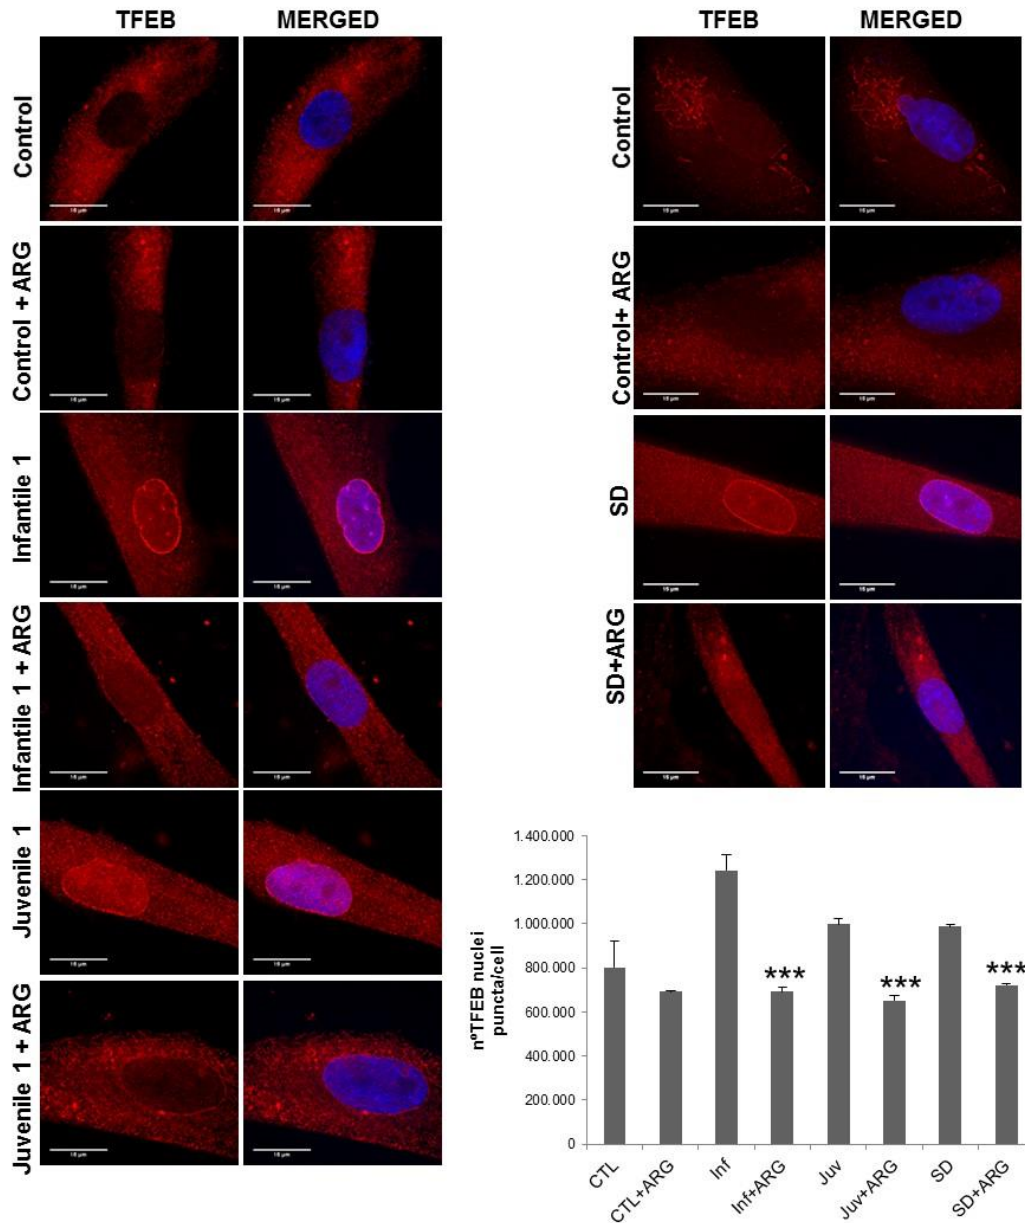

**Supplementary Figure 15.** Representative fluorescence images and quantification of fibroblasts from control, Tay-Sachs (infantil and juvenile) and Sandhoff (SD) with and without L-arginine treatment. Cells were fixed and stained with anti-TFEB antibodies (red). Nuclei were stained with Hoechst 33342 (blue). Increased TFEB in nucleus are shown in patients by red and blue fluorescence signal colocalization which was reduced after L-arginine treatment.
